# Supplementary material
Source: publisher figshare collection journal article supplement (https://acs.figshare.com/ndownloader/files/26699551)
Supplement: Supplementary file 1 [file 26699551]

## SUPPORTING INFORMATION

### **Incorporation of Metal Phosphide Domains into Colloidal Hybrid Nanoparticles**

Emil A. Hernández-Pagán,<sup>1,2,\*</sup> Robert W. Lord,<sup>1</sup> Joseph M. Veglak,<sup>1</sup> and Raymond E. Schaak<sup>1,3,4,\*</sup>

<sup>1</sup> *Department of Chemistry, The Pennsylvania State University, University Park, PA 16802*

<sup>2</sup> *Department of Chemistry and Biochemistry, University of Delaware, Newark, DE 19716*

<sup>3</sup> *Department of Chemical Engineering, The Pennsylvania State University, University Park, PA 16802*

<sup>4</sup> *Materials Research Institute, The Pennsylvania State University, University Park, PA 16802*

\* E-mail: emilhp@udel.edu, res20@psu.edu

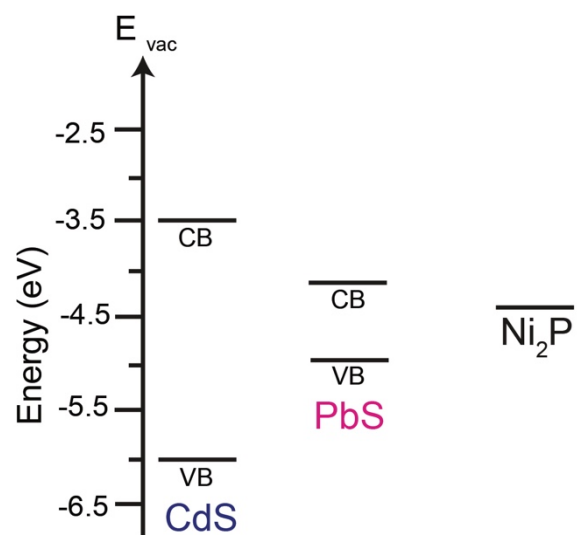

**Figure S1.** Conduction and valence band energy levels for CdS and PbS relative to the work function of  $\text{Ni}_2\text{P}$ .<sup>1-3</sup>

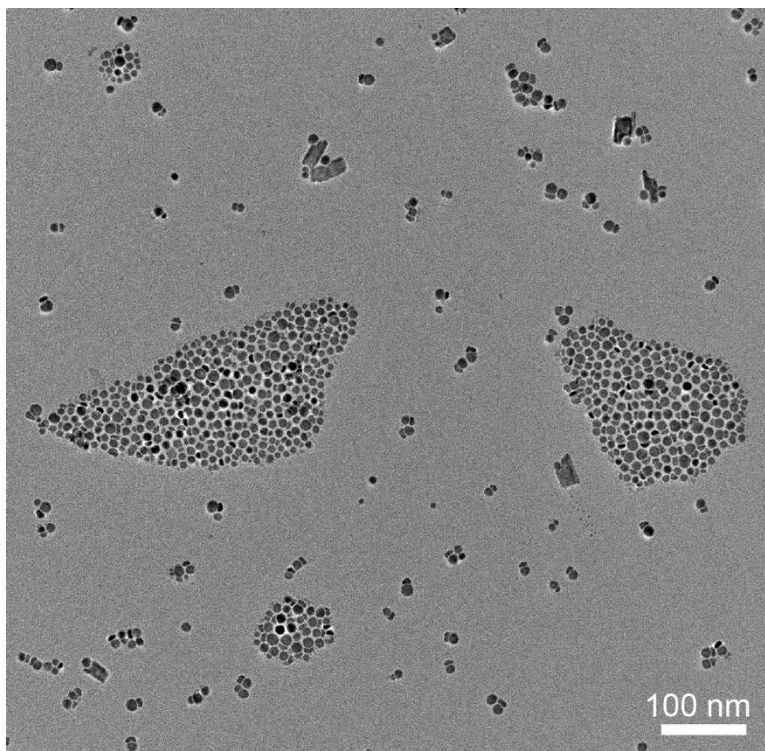

**Figure S2.** TEM image of the Ni<sub>2</sub>P-PbS hybrid nanoparticles.

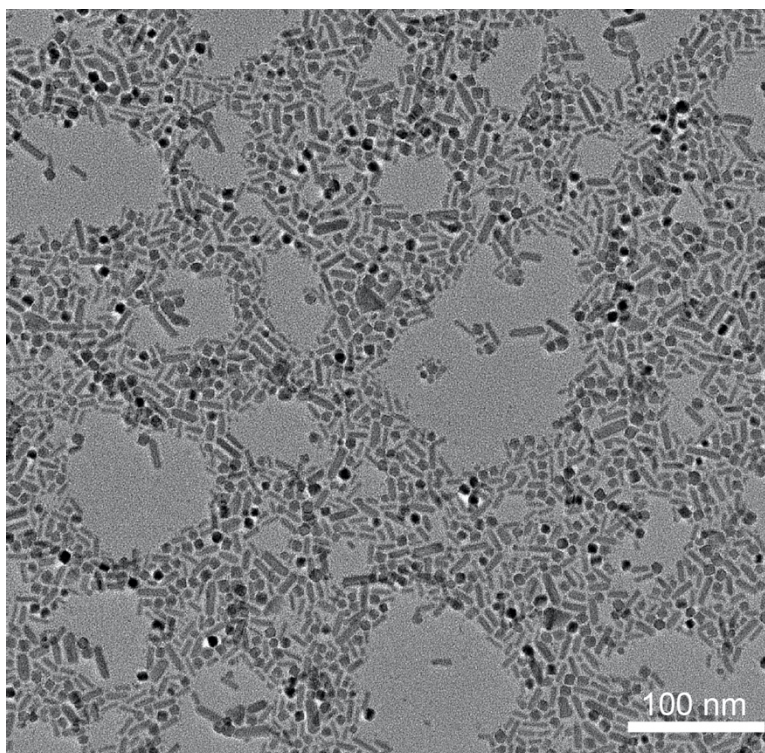

**Figure S3.** TEM image of the Co<sub>x</sub>P<sub>y</sub>-PbS hybrid nanoparticles.



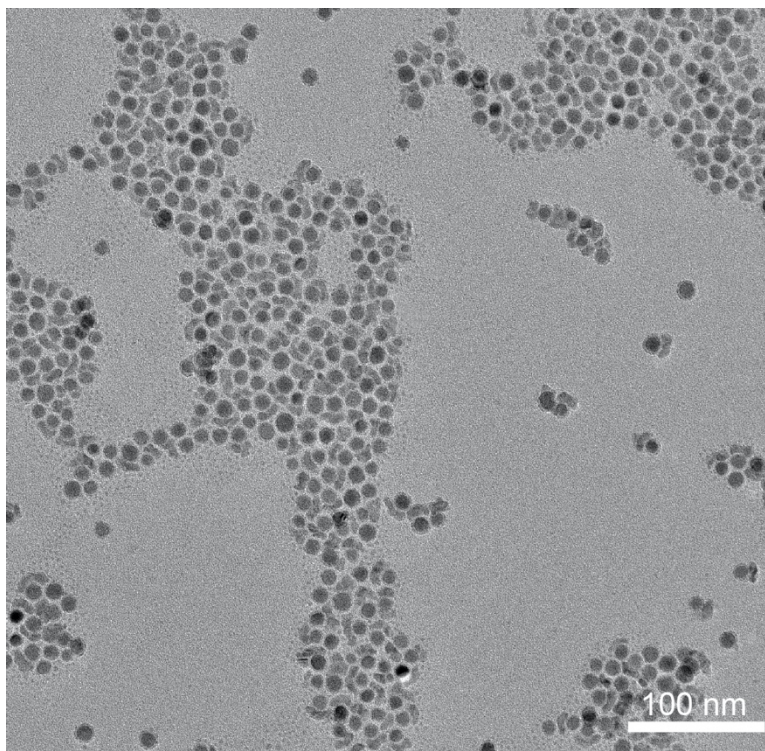

**Figure S4.** TEM image of Ni<sub>2</sub>P–CdS hybrid nanoparticles, showing the presence of CdS quantum dots that homogeneous nucleated during the synthesis.

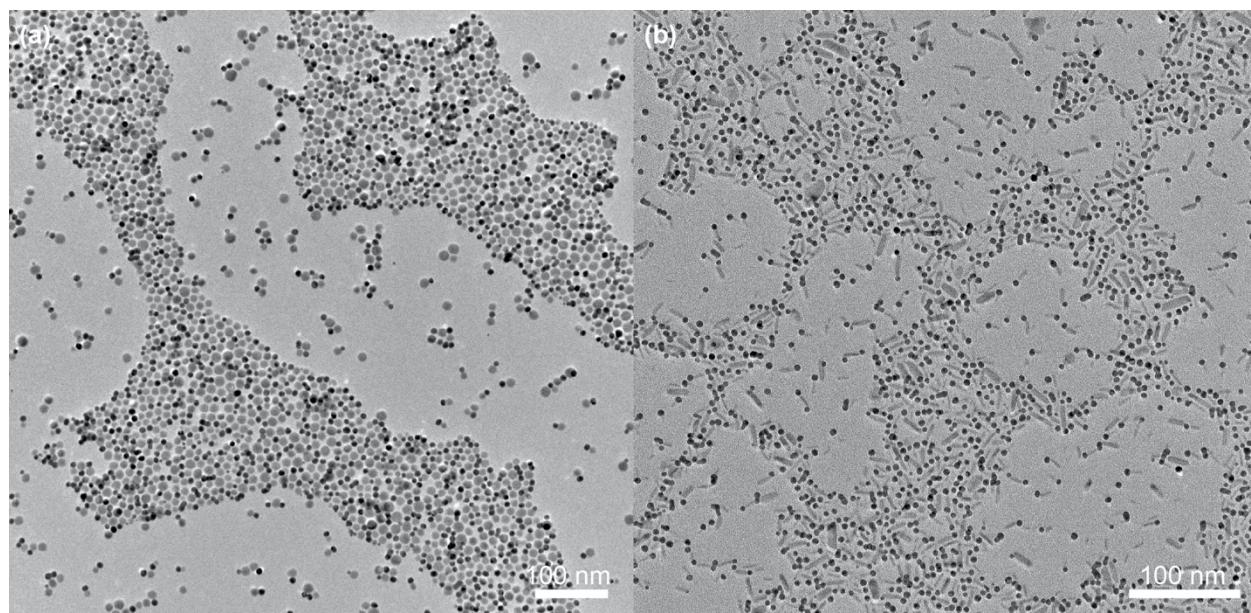

**Figure S5.** TEM image of (a) Ni<sub>2</sub>P–Au and (b) Co<sub>x</sub>P<sub>y</sub>–Au hybrids nanoparticles.

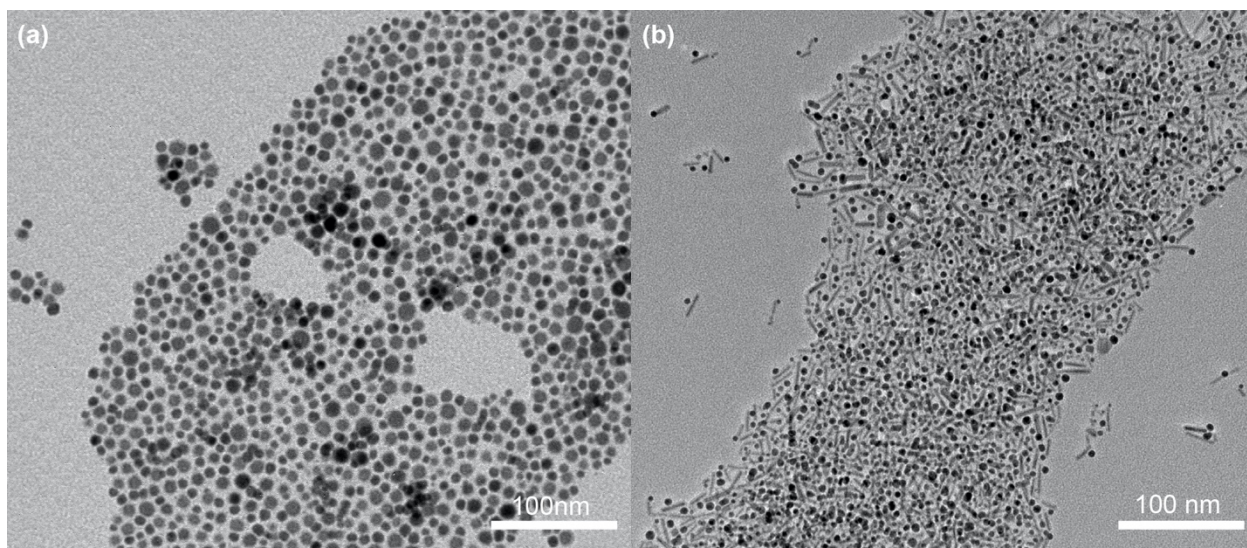

**Figure S6.** TEM image of (a)  $\text{Ni}_2\text{P-Ag}$  and (b)  $\text{Co}_x\text{P}_y\text{-Ag}$  hybrid nanoparticles.

## References

- (1) Nozik, A.; Memming, R. Physical Chemistry of Semiconductor-Liquid Interfaces. *J. Phys. Chem.* **1996**, *100*, 13061–13078.
- (2) Yeon, D.; Lee, S.; Jo, Y.; Moon, J.; Cho, Y. Origin of the enhanced photovoltaic characteristics of PbS thin film solar cells processed at near room temperature. *J. Mater. Chem. A* **2014**, *2*, 20112-20117.
- (3) Song, R.; Zhou, W.; Luo, B.; Jing, D. Highly efficient photocatalytic  $\text{H}_2$  evolution using  $\text{TiO}_2$  nanoparticles integrated with electrocatalytic metal phosphides as cocatalysts. *Appl. Surf. Sci.* **2017**, *416*, 957-964.
